# Supplementary material
Source: Springer Nature journal article supplement (https://www.springermedizin.de/resource/supplementary/12889_2011_3491_MOESM2_ESM.pdf/9489182)
Supplement: MOESM2 [file 9489182]

## **A. Key messages**

- Why report unusual events?
- What events are reportable?
- How to report an unusual event?
- What happens after you report?
- Examples of event reporting

## **B. Toolkit templates**

### **Awareness Campaign Tools**

Template 1: Leaflet for Clinicians

Template 2: Leaflet for Laboratories

Template 3: Poster for Clinicians

Template 4: Poster for Laboratories

Template 5: Wallet Cards for clinicians and Laboratories

### **Education and Training Material**

Template 6: Event Reporting Lecture and Notes

Template 7: Discussion Workshop Package

Template 8: Scenarios

### **Implementation Plan**

Template 9: Implementation Plan
